# Supplementary material for: Obstructive sleep apnoea increases lipolysis and deteriorates glucose homeostasis in patients with type 2 diabetes mellitus
Source: PubMed Central journal article supplement (PMC7878919; doi:10.1038/s41598-021-83018-1), 2021-02-11
Supplement: 41598_2021_83018_MOESM1_ESM.pdf [file 41598_2021_83018_MOESM1_ESM.pdf]

# **Obstructive sleep apnoea increases lipolysis and deteriorates glucose homeostasis in patients with type 2 diabetes mellitus**

Minh Duc Trinh<sup>1,2</sup>, Andrea Plihalova<sup>3,4</sup>, Jan Gojda<sup>3,4</sup>, Katerina Westlake<sup>1</sup>, Jan Spicka<sup>5</sup>, Zuzana Lattova<sup>1</sup>, Martin Pretl<sup>6</sup> and Jan Polak<sup>1,3</sup>

<sup>1</sup> *Department of Pathophysiology, Third Faculty of Medicine, Charles University, Prague, Czech Republic.*

<sup>2</sup> *Department of Cardiology, University Hospital Královské Vinohrady, Prague, Czech Republic*

<sup>3</sup> *Department of Internal Medicine, University Hospital Královské Vinohrady, Prague, Czech Republic*

<sup>4</sup> *Centre for Research on Diabetes, Metabolism and Nutrition, Third Faculty of Medicine, Charles University, Prague, Czech Republic*

<sup>5</sup> *Department of Laboratory Diagnostics, University Hospital Královské Vinohrady, Prague, Czech Republic*

<sup>6</sup> *Neurology and Sleep Laboratory, INSPAMED s.r.o., Prague, Czech Republic*

**Table A. IVGTT Results**

|                                                           | Non-adjusted data |                   |                   | Adjusted data for gender |                   |                   |
|-----------------------------------------------------------|-------------------|-------------------|-------------------|--------------------------|-------------------|-------------------|
|                                                           | Control           | T2DM              | T2DM+OSA          | Control                  | T2DM              | T2DM+OSA          |
| Glucose (mmol/L)                                          | 5.54 (0.42)       | 7.68 (1.79) *     | 7.48 (1.58) *     | 5.49 (1.35)              | 7.67 (1.33) *     | 7.56 (1.39) *     |
| HbA1c (mmol/mol)                                          | 36.21 (3.70)      | 52.70 (11.19) *   | 51.73 (12.47) *   | 36.00 (9.72)             | 52.63 (9.58) *    | 52.07 (9.86) *    |
| Insulin (mU/L)                                            | 10.27 (4.00)      | 14.40 (4.30)      | 17.63 (8.90) *    | 10.71 (5.93)             | 14.57 (5.83)      | 16.84 (6.07) *    |
| HOMA-IR                                                   | 2.55 (1.06)       | 4.86 (1.80) *     | 5.94 (3.50) *     | 2.65 (2.29)              | 4.90 (2.25) *     | 5.75 (2.34) *     |
| AIR <sub>g</sub> (mU.L <sup>-1</sup> .min <sup>-1</sup> ) | 708.57 (458.12)   | 371.60 (590.20)   | 151.97 (170.02) * | 745.23 (442.18)          | 385.60 (434.62)   | 86.64 (452.64) *  |
| DI                                                        | 1077.08 (642.85)  | 355.24 (576.91) * | 174.16 (193.52) * | 1099.12 (543.64)         | 363.66 (534.36) * | 134.88 (556.50) * |
| S <sub>I</sub> (mU/L <sup>-1</sup> .min <sup>-1</sup> )   | 1.69 (0.88)       | 1.58 (1.26)       | 1.21 (0.45)       | 1.70 (0.95)              | 1.59 (0.93)       | 1.18 (0.97)       |
| S <sub>G</sub> (min <sup>-1</sup> )                       | 0.02 (0.01)       | 0.01 (0.01)       | 0.02 (0.01)       | 0.02 (0.01)              | 0.01 (0.01)       | 0.02 (0.01)       |
| β-Cell function (mU/mM)                                   | 125.30 (45.31)    | 109.23 (90.55)    | 119.99 (81.48)    | 130.01 (72.64)           | 111.03 (71.40)    | 111.60 (74.36)    |
| Insulin resistance (mM.mU.L <sup>-2</sup> )               | 2.36 (0.95)       | 4.45 (1.42) *     | 5.47 (3.16) *     | 2.46 (2.00)              | 4.49 (1.97) *     | 5.28 (2.05) *     |

Data are mean (SD). HbA1c = glycated haemoglobin. HOMA-IR = homeostatic model assessment for insulin resistance. AIR<sub>g</sub> – acute insulin response to glucose. DI – disposition index. S<sub>I</sub> = insulin sensitivity. S<sub>G</sub> = glucose effectiveness. \* Significant difference (p<0.05) compared with control group.

**Table B. IVGTT Results**

|                                                           | Non-adjusted data |                   |                   | Adjusted data for BMI |                   |                   |
|-----------------------------------------------------------|-------------------|-------------------|-------------------|-----------------------|-------------------|-------------------|
|                                                           | Control           | T2DM              | T2DM+OSA          | Control               | T2DM              | T2DM+OSA          |
| Glucose (mmol/L)                                          | 5.54 (0.42)       | 7.68 (1.79) *     | 7.48 (1.58) *     | 5.54 (1.34)           | 7.70 (1.35) *     | 7.47 (1.35) *     |
| HbA1c (mmol/mol)                                          | 36.21 (3.70)      | 52.70 (11.19) *   | 51.73 (12.47) *   | 36.21 (9.60)          | 52.62 (9.71) *    | 51.81 (9.74) *    |
| Insulin (mU/L)                                            | 10.27 (4.00)      | 14.40 (4.30)      | 17.63 (8.90) *    | 10.34 (5.32)          | 15.14 (5.38) *    | 16.79 (5.39) *    |
| HOMA-IR                                                   | 2.55 (1.06)       | 4.86 (1.80) *     | 5.94 (3.50) *     | 2.57 (2.11)           | 5.07 (2.14) *     | 5.96 (2.15) *     |
| AIR <sub>g</sub> (mU.L <sup>-1</sup> .min <sup>-1</sup> ) | 708.57 (458.12)   | 371.60 (590.20)   | 151.97 (170.02) * | 710.61 (445.44)       | 391.39 (450.39)   | 129.33 (451.92) * |
| DI                                                        | 1077.08 (642.85)  | 355.24 (576.91) * | 174.16 (193.52) * | 1078.75 (535.16)      | 371.43 (541.10) * | 155.65 (542.95) * |
| S <sub>I</sub> (mU/L <sup>-1</sup> .min <sup>-1</sup> )   | 1.69 (0.88)       | 1.58 (1.26)       | 1.21 (0.45)       | 1.68 (0.89)           | 1.51 (0.90)       | 1.30 (0.91)       |
| S <sub>G</sub> (min <sup>-1</sup> )                       | 0.02 (0.01)       | 0.01 (0.01)       | 0.02 (0.01)       | 0.02 (0.01)           | 0.01 (0.01)       | 0.02 (0.01)       |
| β-Cell function (mU/mM)                                   | 125.30 (45.31)    | 109.23 (90.55)    | 119.99 (81.48)    | 126.10 (66.70)        | 117.02 (67.44)    | 111.08 (67.67)    |
| Insulin resistance (mM.mU.L <sup>-2</sup> )               | 2.36 (0.95)       | 4.45 (1.42) *     | 5.47 (3.16) *     | 2.38 (1.89)           | 4.62 (1.91) *     | 5.27 (1.92) *     |

Data are mean (SD). HbA1c = glycated haemoglobin. HOMA-IR = homeostatic model assessment for insulin resistance. AIR<sub>g</sub> – acute insulin response to glucose. DI – disposition index. S<sub>I</sub> = insulin sensitivity. S<sub>G</sub> = glucose effectiveness. \* Significant difference (p<0.05) compared with control group.

**Table C. IVGTT Results**

|                                                           | Non-adjusted data |                   |                   | Adjusted data for gender, BMI and waist circumference |                   |                   |
|-----------------------------------------------------------|-------------------|-------------------|-------------------|-------------------------------------------------------|-------------------|-------------------|
|                                                           | Control           | T2DM              | T2DM+OSA          | Control                                               | T2DM              | T2DM+OSA          |
| Glucose (mmol/L)                                          | 5.54 (0.42)       | 7.68 (1.79) *     | 7.48 (1.58) *     | 5.31 (1.40)                                           | 7.70 (1.33) *     | 7.78 (1.46) *     |
| HbA1c (mmol/mol)                                          | 36.21 (3.70)      | 52.70 (11.19) *   | 51.73 (12.47) *   | 35.61 (10.57)                                         | 52.56 (9.99) *    | 52.63 (10.94) *   |
| Insulin (mU/L)                                            | 10.27 (4.00)      | 14.40 (4.30)      | 17.63 (8.90) *    | 11.29 (5.49)                                          | 15.27 (5.21)      | 15.33 (5.73)      |
| HOMA-IR                                                   | 2.55 (1.06)       | 4.86 (1.80) *     | 5.94 (3.50) *     | 2.69 (2.30)                                           | 5.11 (2.19) *     | 5.48 (2.40) *     |
| AIR <sub>g</sub> (mU.L <sup>-1</sup> .min <sup>-1</sup> ) | 708.57 (458.12)   | 371.60 (590.20)   | 151.97 (170.02) * | 773.70 (467.74)                                       | 403.35 (443.90)   | 29.03 (487.78) *  |
| DI                                                        | 1077.08 (642.85)  | 355.24 (576.91) * | 174.16 (193.52) * | 1076.97 (582.70)                                      | 383.12 (553.00) * | 146.44 (607.65) * |
| S <sub>I</sub> (mU/L <sup>-1</sup> .min <sup>-1</sup> )   | 1.69 (0.88)       | 1.58 (1.26)       | 1.21 (0.45)       | 1.55 (0.92)                                           | 1.53 (0.88)       | 1.45 (0.96)       |
| S <sub>G</sub> (min <sup>-1</sup> )                       | 0.02 (0.01)       | 0.01 (0.01)       | 0.02 (0.01)       | 0.02 (0.01)                                           | 0.01 (0.01)       | 0.01 (0.01)       |
| β-Cell function (mU/mM)                                   | 125.30 (45.31)    | 109.23 (90.55)    | 119.99 (81.48)    | 140.01 (68.08)                                        | 117.97 (64.61)    | 90.65 (71.00)     |
| Insulin resistance (mM.mU.L <sup>-2</sup> )               | 2.36 (0.95)       | 4.45 (1.42) *     | 5.47 (3.16) *     | 2.52 (2.05)                                           | 4.65 (1.94) *     | 5.03 (2.13) *     |

Data are mean (SD). HbA1c = glycated haemoglobin. HOMA-IR = homeostatic model assessment for insulin resistance. AIR<sub>g</sub> – acute insulin response to glucose. DI – disposition index. S<sub>I</sub> = insulin sensitivity. S<sub>G</sub> = glucose effectiveness. \* Significant difference (p<0.05) compared with control group.

**Table D. Gender differences in adipose tissue lipolysis**

|                                                         | Control        |                | T2DM           |                | T2DM+OSA       |                |
|---------------------------------------------------------|----------------|----------------|----------------|----------------|----------------|----------------|
|                                                         | Male           | Female         | Male           | Female         | Male           | Female         |
| Spontaneous lipolysis ( $\mu\text{mol/l}$ )             | 55.98 (3.93)   | 50.61 (10.66)  | 40.29 (16.70)  | 43.34 (7.85)   | 58.14 (31.16)  | 60.95 (11.73)  |
| Epinephrine-stimulated lipolysis ( $\mu\text{mol/l}$ )  | 152.13 (8.76)  | 122.51 (41.56) | 168.55 (25.47) | 166.31 (62.44) | 277.23 (98.49) | 169.50 (75.36) |
| Isoprenaline-stimulated lipolysis ( $\mu\text{mol/l}$ ) | 148.37 (27.72) | 164.89 (34.99) | 213.75 (86.95) | 180.01 (42.00) | 184.38 (25.06) | 155.88 (62.02) |

Data are mean (SD). Data present dialysate glycerol concentration. There is no significant difference between genders among groups,  $p > 0.05$  for all comparisons.
